# Supplementary material
Source: MDPI journal article supplement (https://www.mdpi.com/2076-3417/11/17/8164)
Supplement: s1 [file s1]

# **AOT + polyethylene glycol eutectics for enhanced oil recovery**

**Cristina Gallego, Alba Somoza, Héctor Rodríguez, Ana Soto\***

CRETUS, Department of Chemical Engineering, Universidade de Santiago de Compostela, E-15782, Santiago de Compostela, Spain

## **SUPPLEMENTARY INFORMATION**

|                                                                                                                                                                            |           |
|----------------------------------------------------------------------------------------------------------------------------------------------------------------------------|-----------|
| <b>Figures S1-S4: <sup>1</sup>H NMR spectra for AOT, PEG-600, PEG1000 and PEG-2000 .....</b>                                                                               | <b>S1</b> |
| <b>Figures S5-S12: TGA and DSC thermograms for pure compounds .....</b>                                                                                                    | <b>S3</b> |
| <b>Table S1. Melting temperatures for AOT + PEG mixtures .....</b>                                                                                                         | <b>S7</b> |
| <b>Table S2. Density (<math>\rho</math>) and dynamic viscosity (<math>\eta</math>) for PEG-600 + AOT eutectic at different temperatures and atmospheric pressure. ....</b> | <b>S7</b> |

---

\* Corresponding author. E-mail: ana.soto@usc.es

**$^1\text{H}$  NMR spectra for AOT, PEG-600, PEG-1000, and PEG-2000**

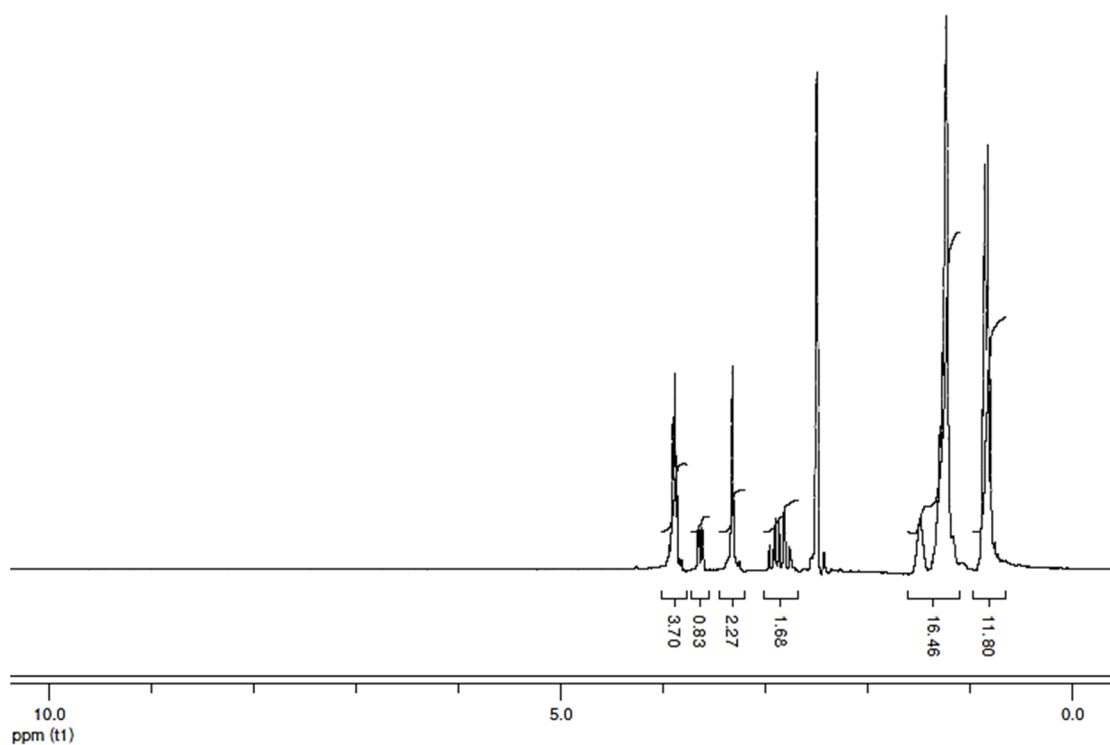

Figure S1.  $^1\text{H}$  NMR spectrum of AOT.  $^1\text{H}$  NMR,  $\delta_{\text{H}}$  (DMSO- $d_6$ , 300 MHz): 0.66-0.97 (unresolved, 12H,  $4 \times \text{CH}_3$ ), 1.10-1.61 (unresolved, 16H,  $2 \times \text{CHCH}_2\text{CH}_3$  and  $2 \times \text{CH}(\text{CH}_2)_3\text{CH}_3$ ), 2.69-3.01 (unresolved, 2H,  $2 \times \text{OCH}_2\text{CH}$ ), 3.20-3.44 (unresolved, 2H,  $\text{O}_3\text{SCHCH}_2$ ), 3.55-3.72 (unresolved, 1H,  $\text{O}_3\text{SCH}$ ), 3.77-4.01 (unresolved, 4H,  $2 \times \text{OCH}_2$ ). The peak at 2.50 ppm corresponds to the residual proton signal of the perdeuterated solvent.

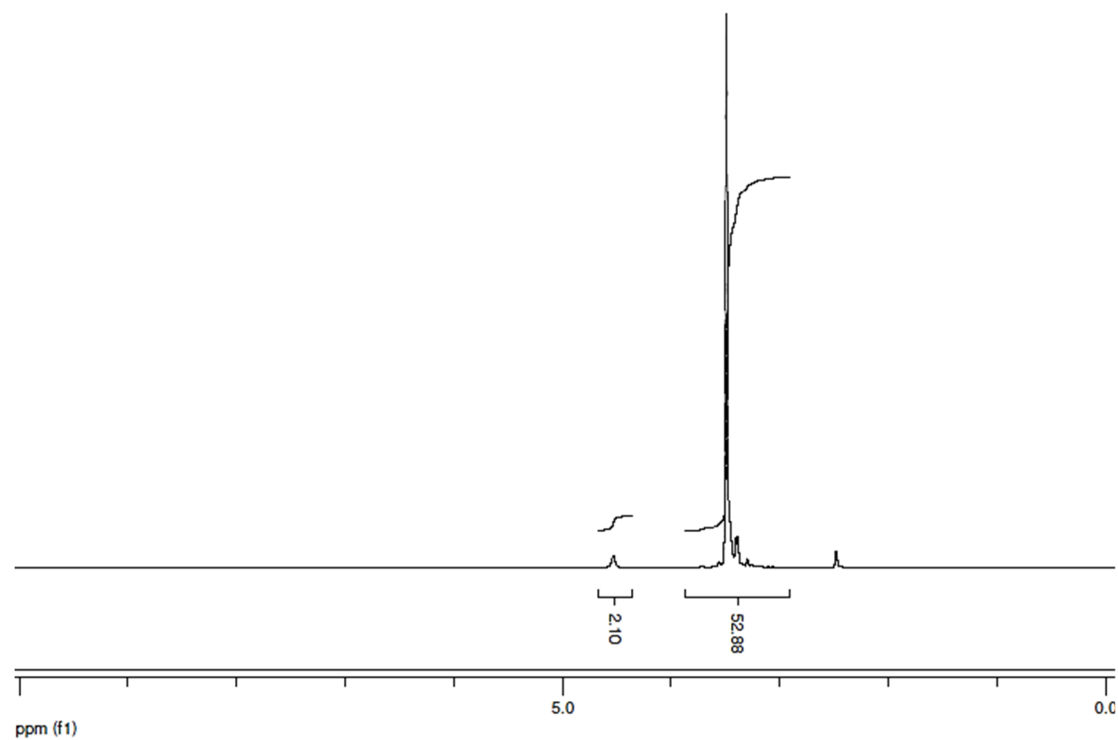

Figure S2.  $^1\text{H}$  NMR spectrum of PEG-600.  $^1\text{H}$  NMR,  $\delta_{\text{H}}$  (DMSO- $d_6$ , 300 MHz): 3.20-3.75 (unresolved, 53H,  $\text{HO}(\text{CH}_2\text{CH}_2\text{O})_n\text{H}$ ), 4.53 (s, 2H,  $\text{HO}(\text{CH}_2\text{CH}_2\text{O})_n\text{H}$ ). The peak at 2.50 ppm corresponds to the residual proton signal of the perdeuterated solvent.

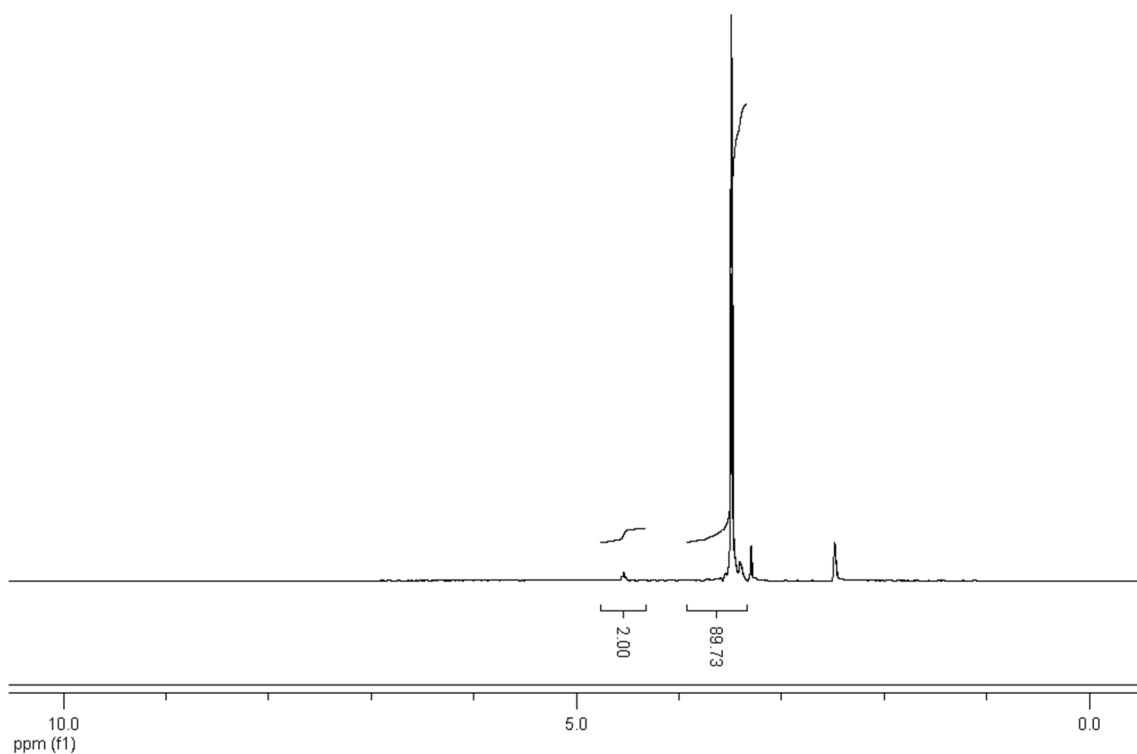

Figure S3.  $^1\text{H}$  NMR spectrum of PEG-1000.  $^1\text{H}$  NMR,  $\delta_{\text{H}}$  (DMSO- $\text{d}_6$ , 300 MHz): 3.35-3.60 (unresolved, 89H,  $\text{HO}(\text{CH}_2\text{CH}_2\text{O})_n\text{H}$ ), 4.53 (m, 2H,  $\text{HO}(\text{CH}_2\text{CH}_2\text{O})_n\text{H}$ ). The peak at 2.50 ppm corresponds to the residual proton signal of the perdeuterated solvent, and the peak at 3.30 ppm corresponds to trace water present in the NMR mixture (solvent + PEG).

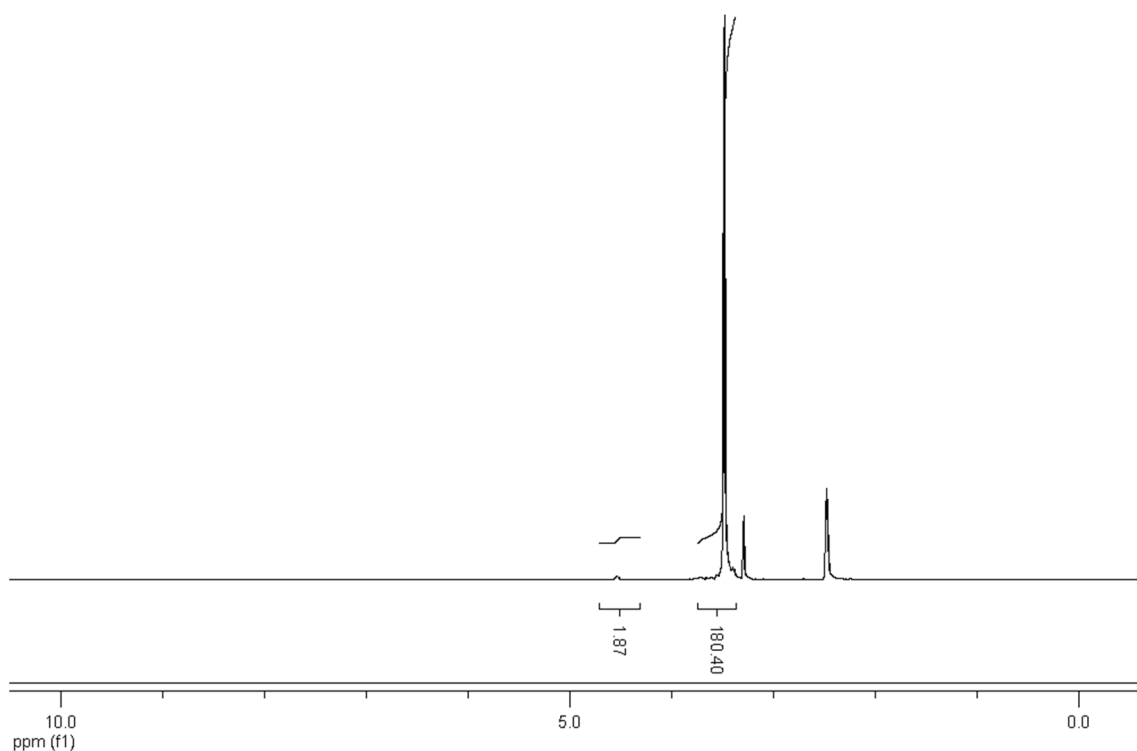

Figure S4.  $^1\text{H}$  NMR spectrum of PEG-2000.  $^1\text{H}$  NMR,  $\delta_{\text{H}}$  (DMSO- $\text{d}_6$ , 300 MHz): 3.35-3.50 (unresolved, 180H,  $\text{HO}(\text{CH}_2\text{CH}_2\text{O})_n\text{H}$ ), 4.53 (s, 2H,  $\text{HO}(\text{CH}_2\text{CH}_2\text{O})_n\text{H}$ ). The peak at 2.50 ppm corresponds to the residual proton signal of the perdeuterated solvent, and the peak at 3.30 ppm corresponds to trace water present in the NMR mixture (solvent + PEG).

## TGA and DSC thermograms for pure compounds

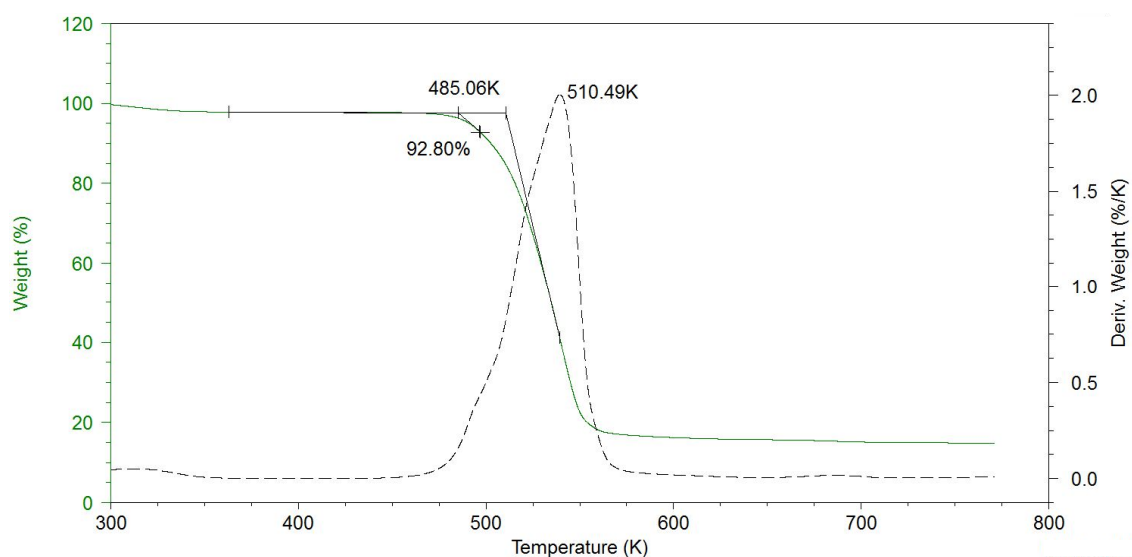

Figure S5. TGA thermogram of AOT, showing the determination of the regular onset decomposition temperature ( $T_d$ ) and the 5 % onset decomposition temperature ( $T_{d,5\%}$ ). The green solid line represents the weight percentage as a function of temperature, while the black dashed line represents its first derivative.

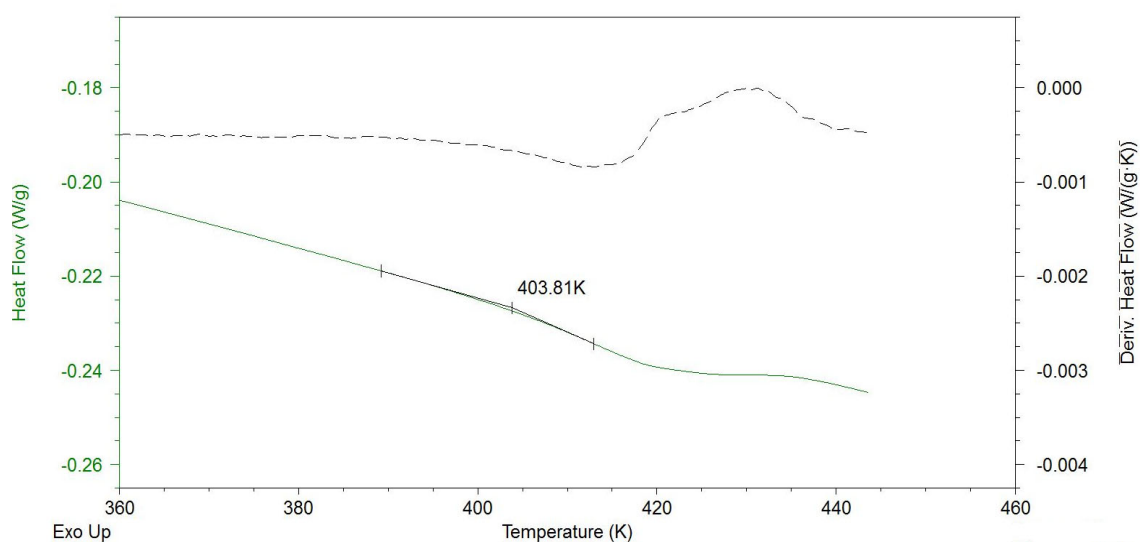

Figure S6. DSC thermogram of AOT, showing the determination of the onset melting temperature. The green solid line represents the heat flow as a function of temperature, while the black dashed line represents its first derivative.

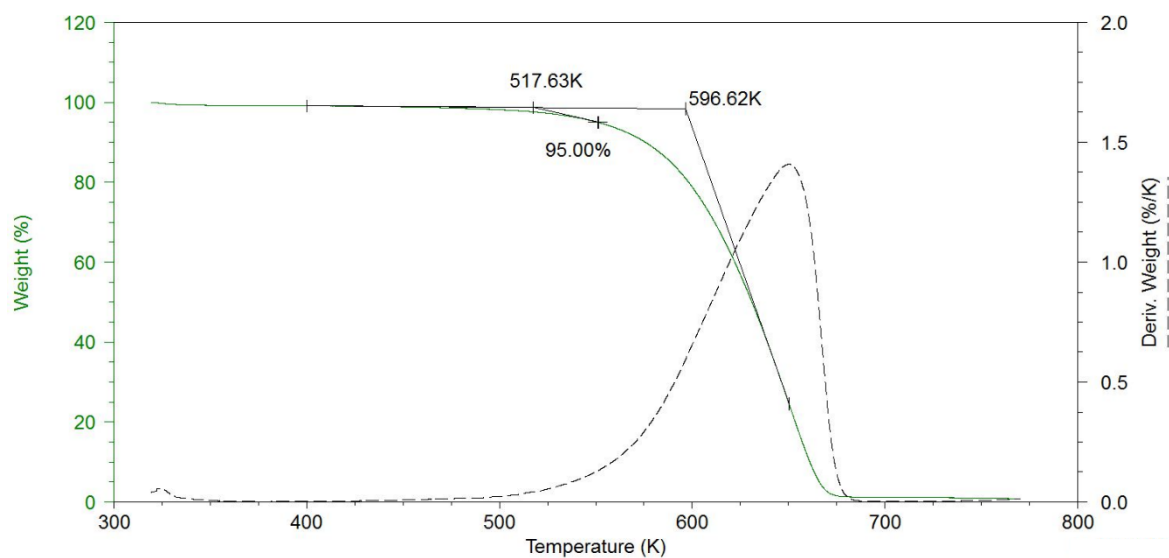

Figure S7. TGA thermogram of PEG-600, showing the determination of the regular onset decomposition temperature ( $T_d$ ) and the 5 % onset decomposition temperature ( $T_{d,5\%}$ ). The green solid line represents the weight percentage as a function of temperature, while the black dashed line represents its first derivative.

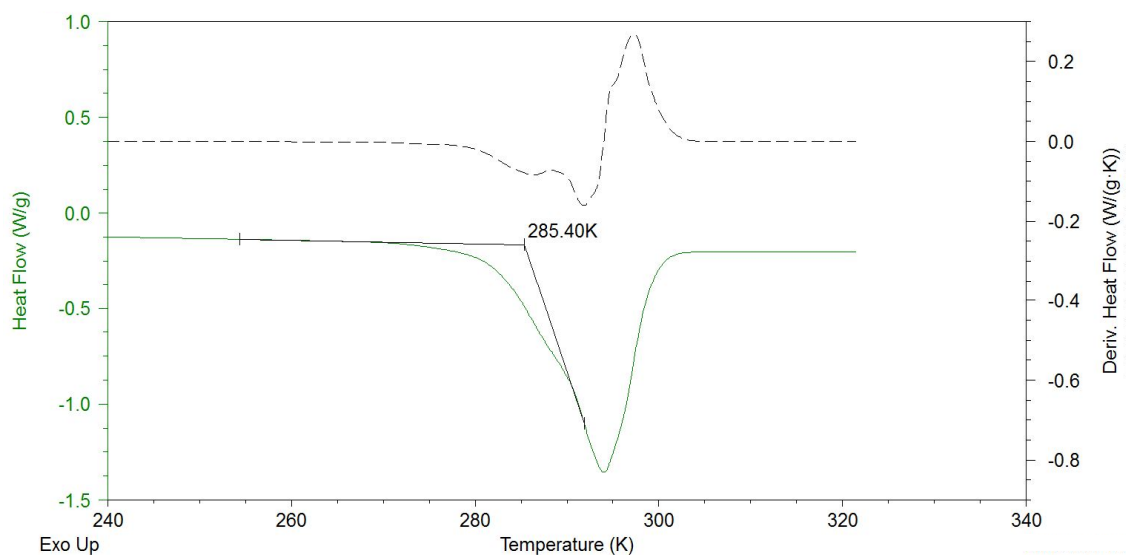

Figure S8. DSC thermogram of PEG-600, showing the determination of the onset melting temperature. The green solid line represents the heat flow as a function of temperature, while the black dashed line represents its first derivative.

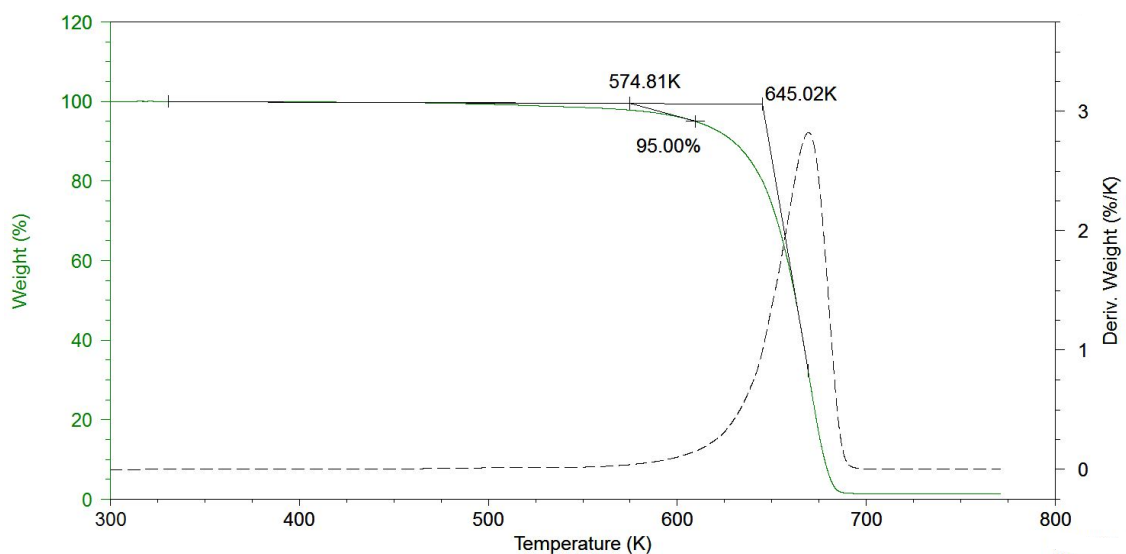

Figure S9. TGA thermogram of PEG-1000, showing the determination of the regular onset decomposition temperature ( $T_d$ ) and the 5 % onset decomposition temperature ( $T_{d,5\%}$ ). The green solid line represents the weight percentage as a function of temperature, while the black dashed line represents its first derivative.

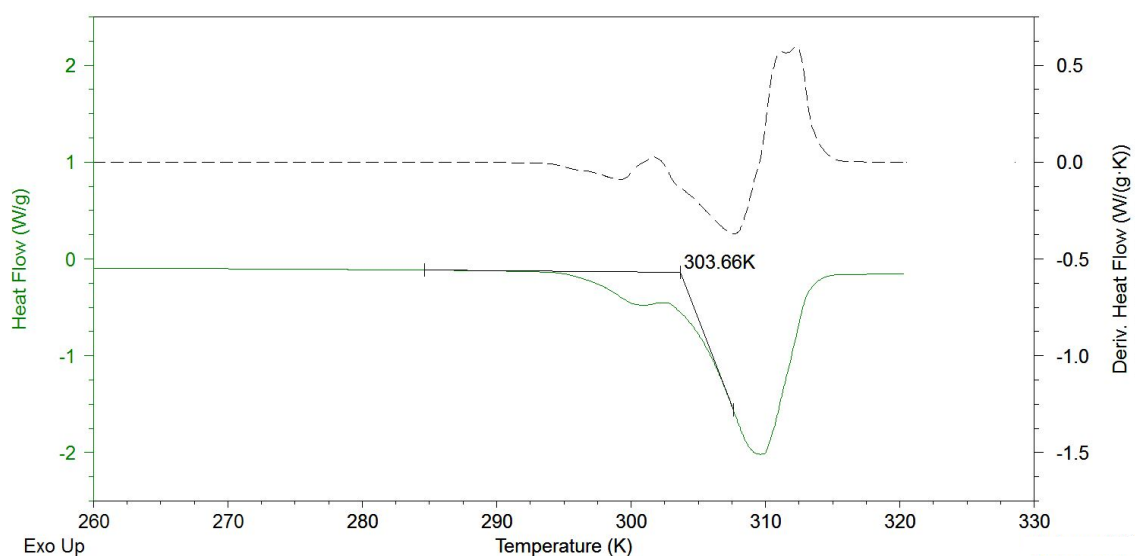

Figure S10. DSC thermogram of PEG-1000, showing the determination of the onset melting temperature. The green solid line represents the heat flow as a function of temperature, while the black dashed line represents its first derivative.

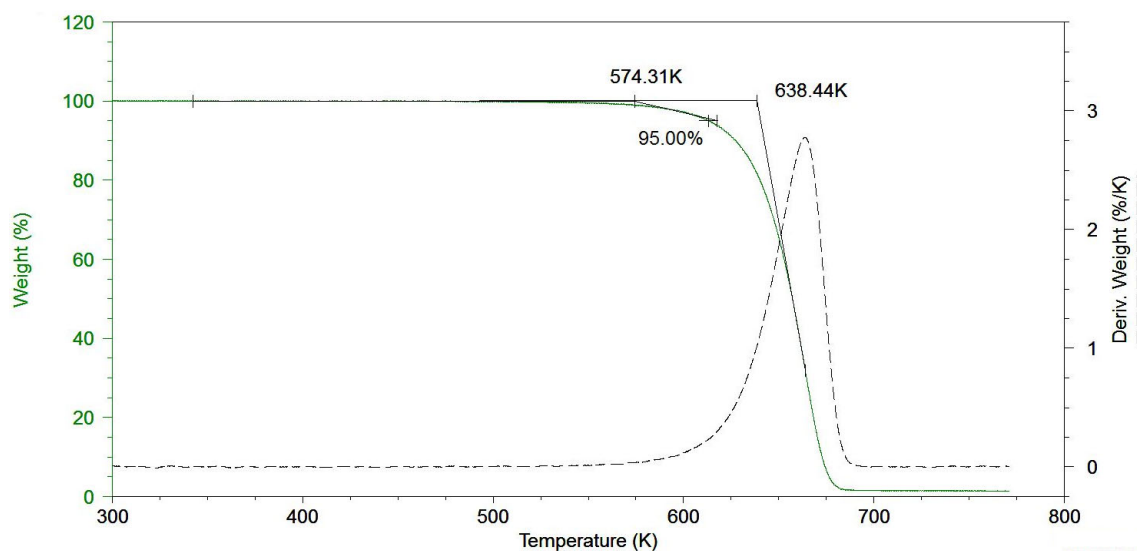

Figure S11. TGA thermogram of PEG-2000, showing the determination of the regular onset decomposition temperature ( $T_d$ ) and the 5 % onset decomposition temperature ( $T_{d,5\%}$ ). The green solid line represents the weight percentage as a function of temperature, while the black dashed line represents its first derivative.

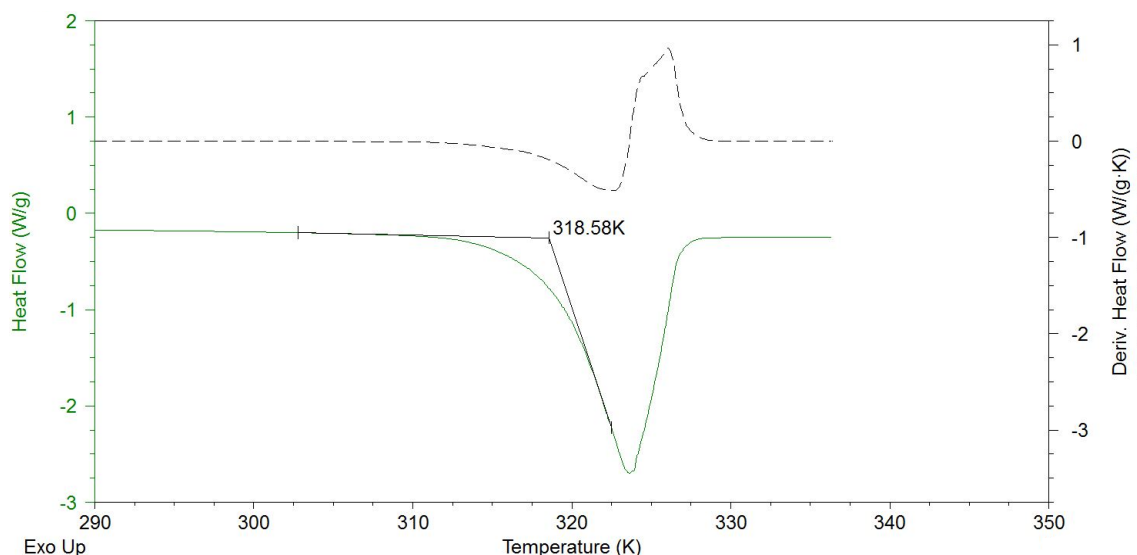

Figure S12. DSC thermogram of PEG-2000, showing the determination of the onset melting temperature. The green solid line represents the heat flow as a function of temperature, while the black dashed line represents its first derivative.

**Table S1. Melting temperatures for AOT + PEG mixtures.**

| AOT mole fraction | $T_m$ (K)     |                |                |
|-------------------|---------------|----------------|----------------|
|                   | AOT + PEG-600 | AOT + PEG-1000 | AOT + PEG-2000 |
| 0.0               | 285           | 304            | 319            |
| 0.1               | 282           | 301            | 319            |
| 0.2               | 281           | 300            | 318            |
| 0.3               | 280           | 297            | 318            |
| 0.4               | 275           | 293            | 318            |
| 0.5               | 278           | 292            | 317            |
| 0.6               | 279           | 290            | 316            |
| 0.7               | 283           | 292            | 315            |
| 0.8               | 285           | 296            | 314            |
| 0.9               | 285           | 298            | 317            |
| 1.0               | 404           | 404            | 404            |

**Table S2. Density ( $\rho$ ) and dynamic viscosity ( $\eta$ ) for AOT + PEG-600 eutectic composition at different temperatures and atmospheric pressure.**

| T (K)  | $\rho$ (g·cm <sup>-3</sup> ) | $\eta$ (mPa·s) |
|--------|------------------------------|----------------|
| 288.15 | 1.135682                     | 869.31         |
| 298.15 | 1.127670                     | 392.44         |
| 308.15 | 1.119781                     | 216.44         |
| 318.15 | 1.111923                     | 129.82         |
| 328.15 | 1.104087                     | 85.513         |
| 338.15 | 1.096291                     | 59.669         |
| 348.15 | 1.088518                     | 42.024         |
